# Supplementary material for: The Norway spruce genome sequence and conifer genome evolution
Source: Springer Nature journal article supplement (doi:10.1038/nature12211), 2013-05-01

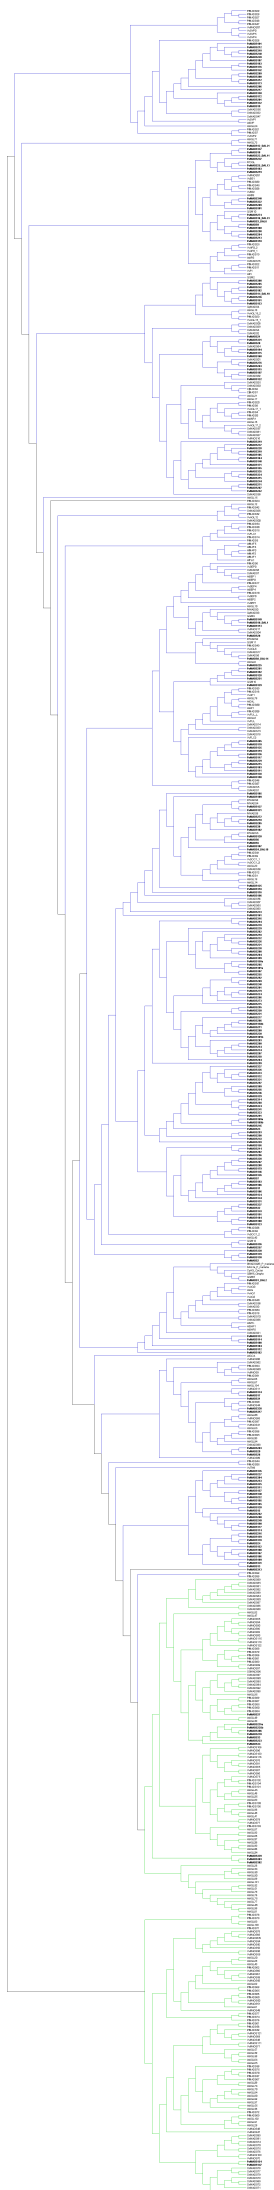

Supplement: 41586_2013_BFnature12211_MOESM89_ESM.pdf [file 41586_2013_BFnature12211_MOESM89_ESM.pdf]
